# Supplementary material for: The long non-coding RNA ROCR contributes to SOX9 expression and chondrogenic differentiation of human mesenchymal stem cells
Source: PubMed Central journal article supplement (PMC5769619; doi:10.1242/dev.152504), 2017-12-15
Supplement: develop-144-152504-s1.pdf [file develop-144-152504-s1.pdf]

# Supplementary Figure 1

A.

**>ROCR transcript variant 1 (LOC102723505, ENST00000430908, AC005152.3)**

AGCCTTTTAAGACACATGTTTTGGAATACAGTCAAATGCGTGCTGCTGTATGACCAGCCTATTTGAACTA  
 CTTAAGCATCAACTAATTAATCTGCAAGTGAAGAATACTTCCAGCATTACTCTATAATTAGACAATCTCAG  
GAGGAAACAAGAGGATTTCAAAGGGGAGTCAGATGGTTTCGCAGACCGCTACATCATTTATTTTTTCATC  
 ACTCAGATTATGCCTCCAAATCCTACAGAAGTATAACAACCATAGAACAGACAAAACCAACAGCATCAA  
 CAACAGAGAAACTCAGTCCAGGAGGATATGAAACCCTTTGTAATAAAGAAAGCAACATCCATGAA

**>ROCR transcript variant 2**

AGTCCTTGAGGGACAAGAAAGTGGAGCCCAGGACTTTCCAGTCCCCACCTAGTGATCAACGTCTCACCC  
 ACGGTCAGGGGAGCAACTGGTGGTTCTACTTTTTGAATCTGAAGGCAAAGGCAAGCTTTTTTTAGGG  
 GTCCTGCTGTTGGCAGAGAAAGCTCCCAAGAGTTCTGCAGAGAAGAAGGATATAGACTCCAAAATTTTA  
 CTTCCAGGGACCATTTTCAGTAGAGCCTTTTAAGACACATGTTTTGGAATACAGTCAAATGCGTGCTGCTG  
TATGACCAGCCTATTTGAACTACTTAAGCATCAACTAATTAATCTGCAAGTGAAGAATACTTCCAGCATT  
 CTCTATAATTAGACAATCTCAGGAGGAAACAAGAGGATTTCAAAGGGGAGTCAGATGGTTTCGCAGACC  
 GCTACATCATTTATTTTTTCATCACTCAGATTATGCCTCCAAATCCTACAGAAGTATAACAACCATAGAAC  
 AGACAAAACCAACAGCATCAACAACAGAGAAACTCAGTCCAGGAGGATATGAAACCCTTTGTAATAAA  
 GAAAGCAACATCCATGA

**>ROCR transcript variant 3**

CAGCGGTTGATTGCGAGGAGCAGCGGAAGGAAGGATGTATCAAACCGAAAGAAGAAAGAACCCCTGC  
 CAGTCGCCCCATGACATCCGACTCTGAACGGCAGCGATCTAGAGGCTGCGGCGTGTTCAGATTAACA  
 GCAGCGAGGGCAGGAGGCAAATCAGATGCCGAGGAGCTGACTGTTTTCTTTAGCCCTGAGAGCTGAC  
 TGTAGGCACAGGTTGCATATCAAAGGCAACGGGAATCAGTCTGTGGCAATATTACATCAGGGACCATTT  
 CAGTAGAGCCTTTTAAGACACATGTTTTGGAATACAGTCAAATGCGTGCTGCTGTATGACCAGCCTATTT  
GAACTACTTAAGCATCAACTAATTAATCTGCAAGTGAAGAATACTTCCAGCATTACTCTATAATTAGACA  
TCTCAGGAGGAAACAAGAGGATTTCAAAGGGGAGTCAGATGGTTTCGCAGACCGCTACATCATTTATTT  
 TTTCACTCAGATTATGCCTCCAAATCCTACAGAAGTATAACAACCATAGAACAGACAAAACCAACA  
 GCATCAACAACAGAGAAACTCAGTCCAGGAGGATATGAAACCCTTTGTAATAAAGAAAGCAACATCCAT  
 GA

B.

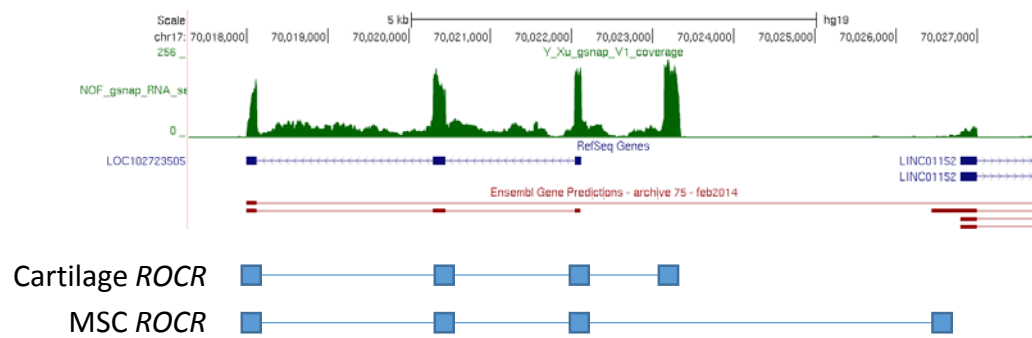

Supplementary Figure 1.

A. Transcript sequences of *ROCR* variants identified by RNA-Seq and RACE. Exons are delineated by the change between black and grey nucleotides. Primer locations are indicated by underlining (blue for exon1-2 assay, red for exon2-3 assay). B. Genome browser schematic of the two 4 exon transcript variants of *ROCR* with alternative first exons as indicated by 5'RACE from cartilage and MSC RNA.

# Supplementary Figure 2

A.

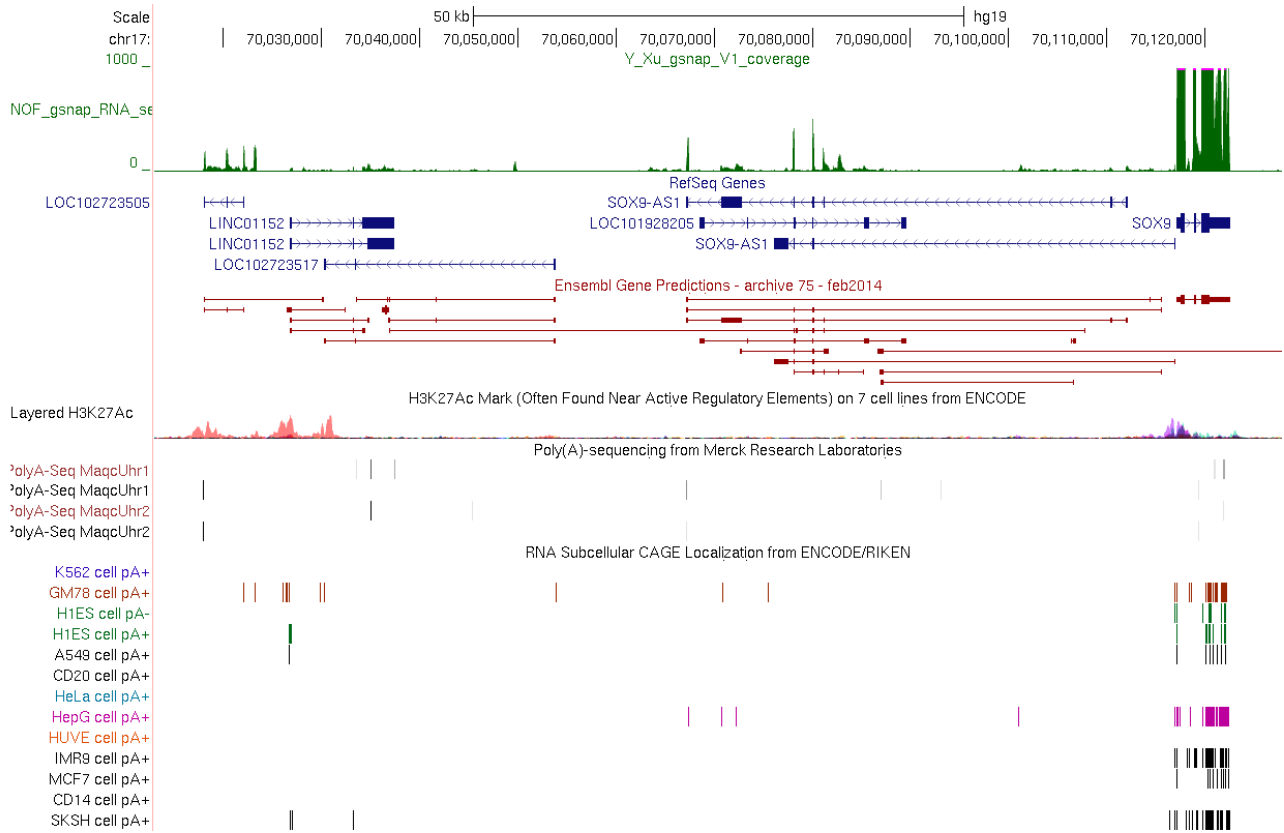

B.

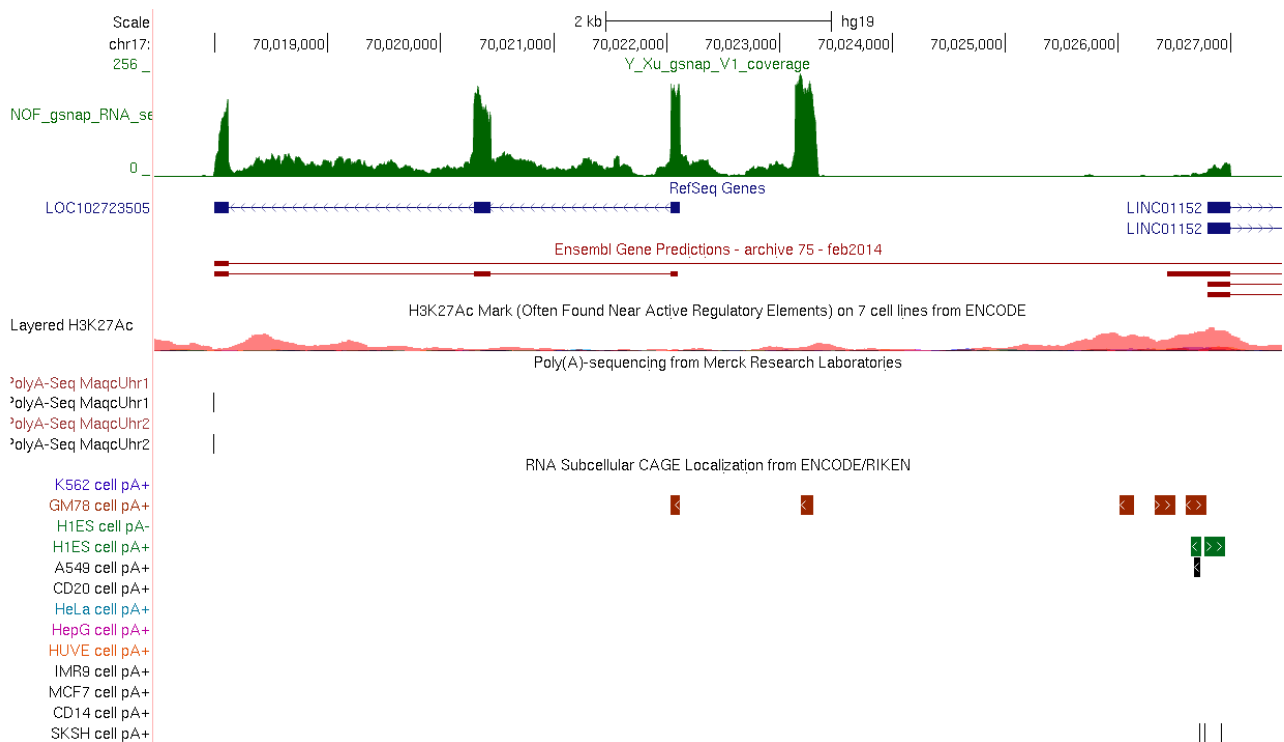

Supplementary Figure 2.

UCSC genome browser schematic of cartilage RNA-Seq reads aligned to the human genome with evidence of transcript start and end sites using CAGE (cap analysis gene expression) and PolyA-Seq data. A. *SOX9* and upstream locus. B. *ROCR* locus.

## Supplementary Figure 3

A.

|                | ORFfinder |      |                  |
|----------------|-----------|------|------------------|
|                | Start     | Stop | Length (nt   aa) |
| ENST0000430908 | 50        | 127  | 78   25          |
| ROCR_HAC       | 279       | 356  | 78   25          |
| ROCR_MSC       | 79        | 177  | 99   32          |
|                | 329       | 406  | 78   25          |
| SOX9-AS1       | 483       | 776  | 294   97         |
|                | 2739      | 2930 | 192   63         |
|                | 837       | 1001 | 165   54         |
|                | 1511      | 1672 | 162   53         |
|                | 125       | 280  | 156   51         |
|                | 1393      | 1521 | 129   42         |
|                | 76        | 201  | 126   41         |
|                | 2295      | 2408 | 114   37         |
|                | 2100      | 2204 | 105   34         |
|                | 2137      | 2238 | 102   33         |
|                | 256       | 351  | 96   31          |
|                | 1908      | 1988 | 81   26          |
|                | 589       | 666  | 78   25          |
| LINC01152      | 2605      | 2757 | 153   50         |
|                | 2571      | 2711 | 141   46         |
|                | 1048      | 1179 | 132   43         |
|                | 1182      | 1304 | 123   40         |
|                | 1967      | 2086 | 120   39         |
|                | 320       | 430  | 111   36         |
|                | 286       | 390  | 105   34         |
|                | 2460      | 2546 | 87   28          |
|                | 861       | 944  | 84   27          |
|                | 2251      | 2334 | 84   27          |
|                | 1124      | 1201 | 78   25          |
|                | 2803      | 2880 | 78   25          |
| SOX9           | 373       | 1902 | 1530   509       |
|                | 1241      | 1519 | 279   92         |
|                | 3334      | 3564 | 231   76         |
|                | 2668      | 2862 | 195   64         |
|                | 2161      | 2322 | 162   53         |
|                | 2859      | 2996 | 138   45         |
|                | 2099      | 2227 | 129   42         |
|                | 1927      | 2049 | 123   40         |
|                | 2936      | 3037 | 102   33         |
|                | 3256      | 3333 | 78   25          |

B.

| Sequence Name   | RNA Size | Fickett Score | Hexamer Score | CPAT               |              | CPC                    |                        |
|-----------------|----------|---------------|---------------|--------------------|--------------|------------------------|------------------------|
|                 |          |               |               | Coding Probability | Coding Label | CODING POTENTIAL SCORE | C/NC                   |
| ENST00000430908 | 346      | 0.7649        | -0.081        | 0.012              | no           | -1.285                 | noncoding<br>noncoding |
| ROCR_HAC        | 574      | 0.7649        | -0.081        | 0.012              | no           | -0.758                 | (weak)                 |
| ROCR_MSC        | 624      | 0.7649        | -0.081        | 0.012              | no           | -1.332                 | noncoding              |
| SOX9-AS1        | 3032     | 1.0343        | -0.010        | 0.128              | no           | -1.018                 | noncoding              |
| LINC01152       | 3578     | 0.9027        | -0.053        | 0.015              | no           | 0.364                  | coding (weak)          |
| SOX9            | 3963     | 1.3018        | 0.647         | 1.000              | yes          | 8.199                  | coding                 |

## Supplementary Figure 3

C.

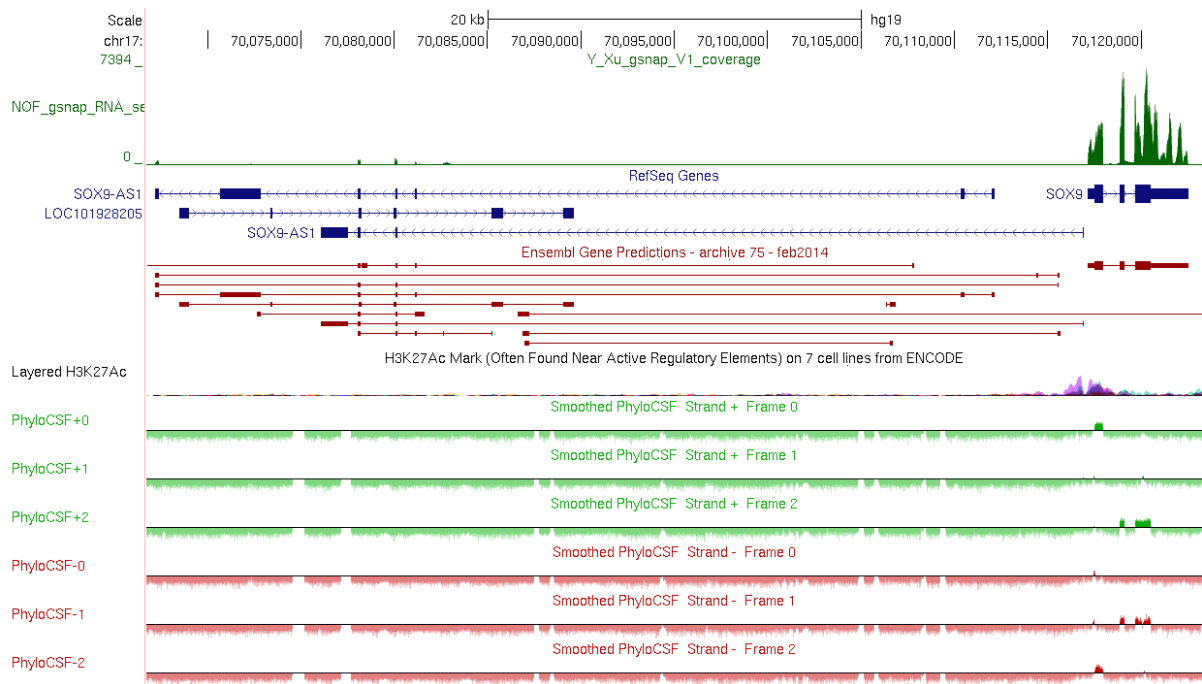

D.

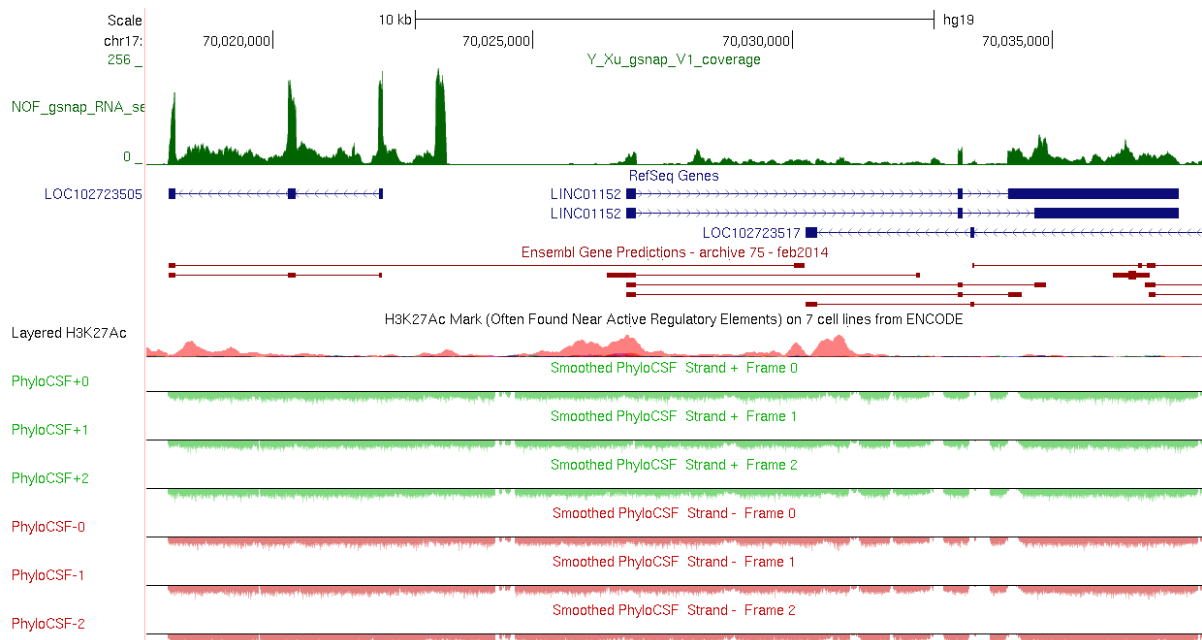

Supplementary Figure 3.

*In silico* analysis indicates a lack of coding potential for both *SOX9-ASI* and *ROCR*, with the existence of A. only very short open reading frames (ORF Finder) and B-D. codon substitution rates indicative of noncoding transcripts. B. CPAT and CPC. C. PhyloCSF on *SOX9* and *SOX9-ASI* locus. D. PhyloCSF on *ROCR* locus.

## Supplementary Figure 4

A.

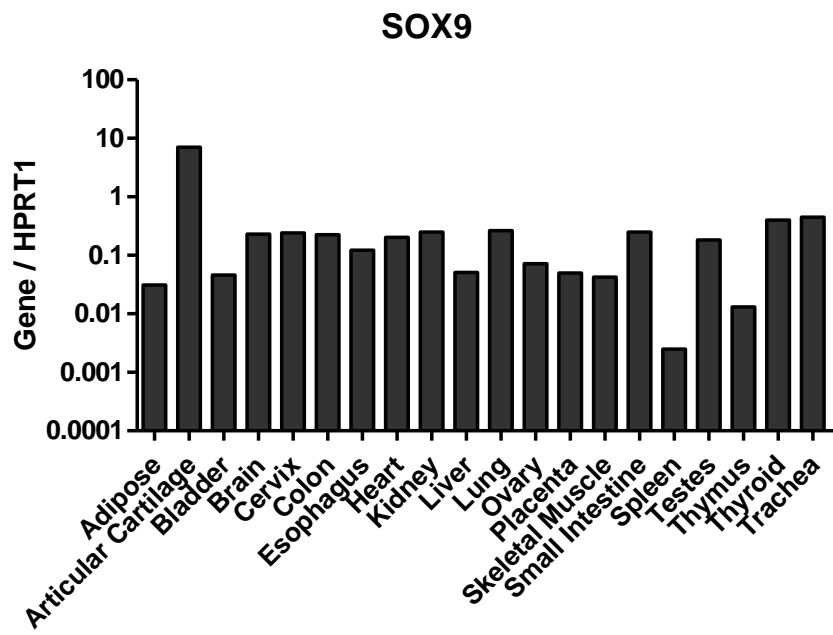

B.

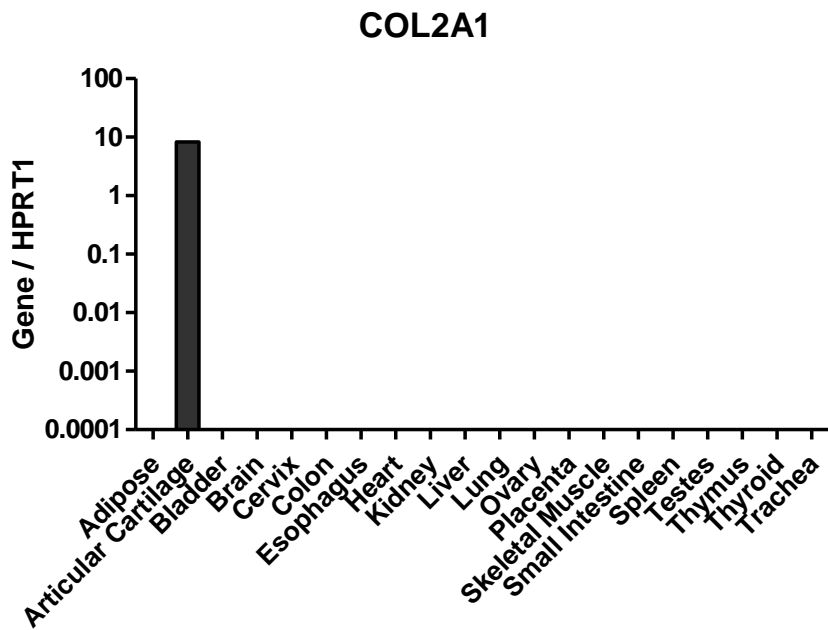

C.

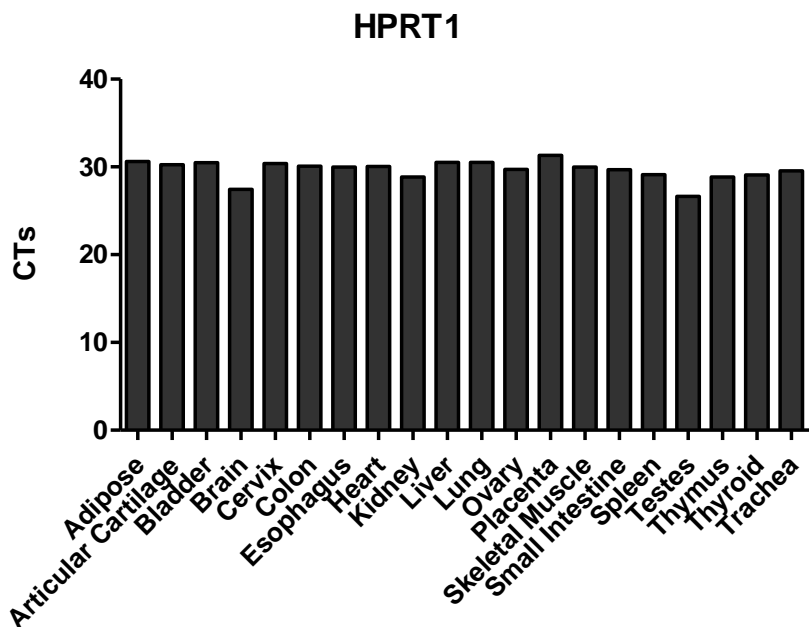



Supplementary Figure 4.

Expression of A. *SOX9*, B. *COL2A1* and C. *HPRT1* in an RNA tissue panel measured by real-time RT-PCR. Values are the technical mean of data pooled from 3 donors per tissue.

## Supplementary Figure 5

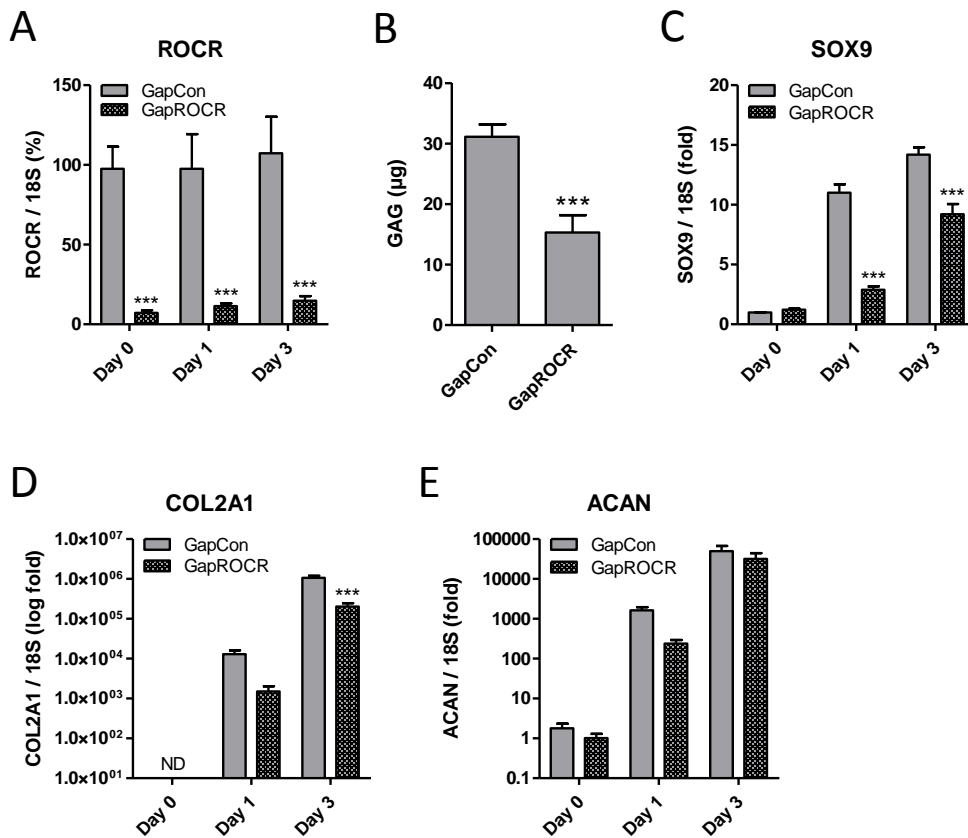

## Supplementary Figure 5.

MSCs were transfected for 1 day with *ROCR*-targetting or non-targetting control GapmeR prior to chondrogenic differentiation in a V-bottom 96 well plate. A. *ROCR* expression in RNA extracted from Day 0, 1 and 3 chondrogenic pellets. Expression is presented as a percentage of non-targetting control levels. B. GAG levels assayed by DMB assay in Day 7 chondrogenic pellets. C-E. Expression of (C) *SOX9*, (D) *COL2A1*, (E) *ACAN* in RNA extracted from Day 0, 1 and 3 chondrogenic pellets. Values are the mean  $\pm$  SEM of data pooled from 4 MSC donors. \*\*\* =  $P < 0.001$  for *ROCR* GapmeR versus non-targetting GapmeR.

## Supplementary Figure 6

A

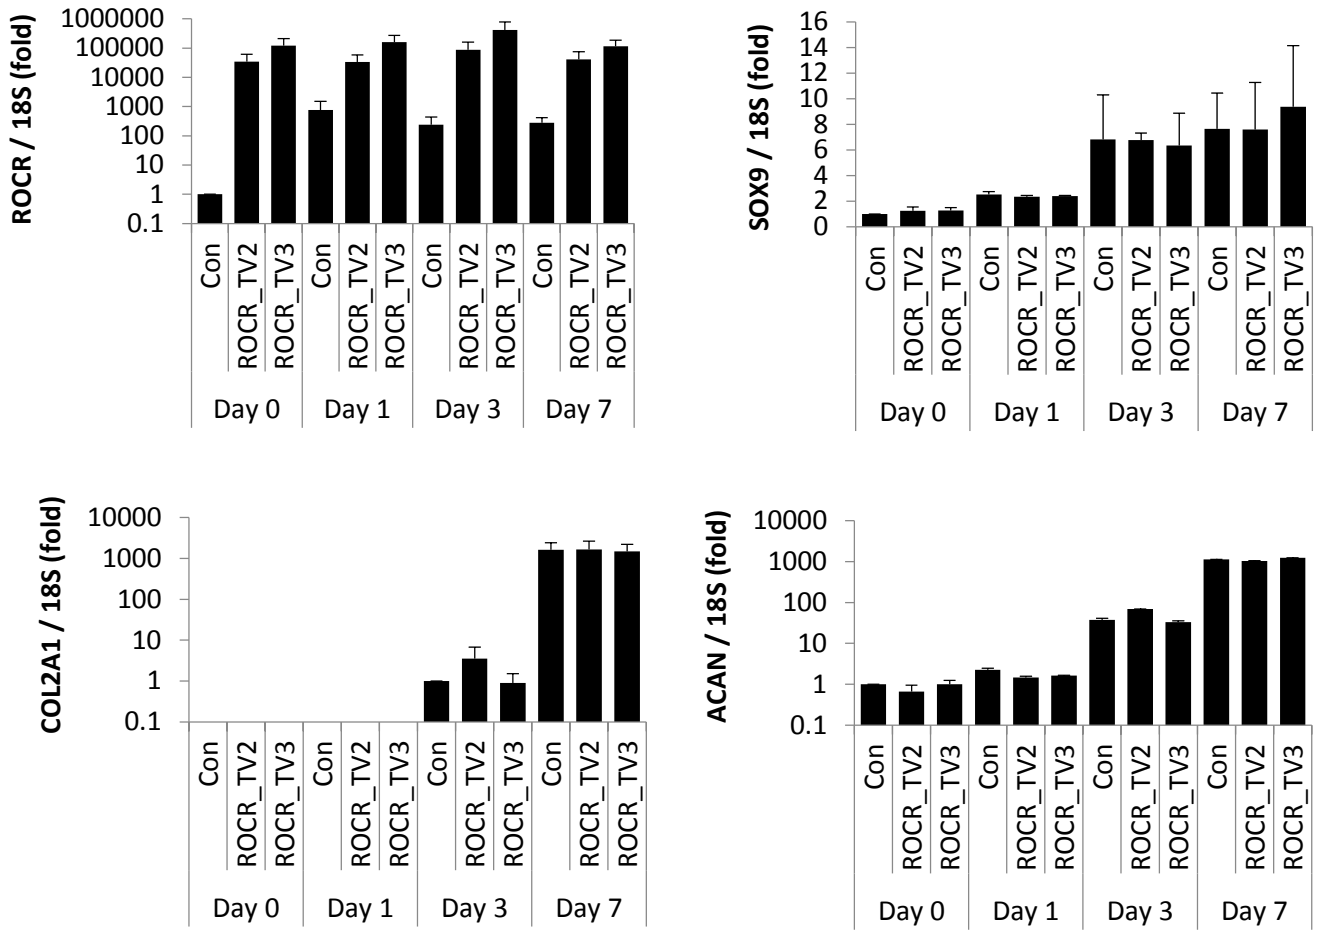

B

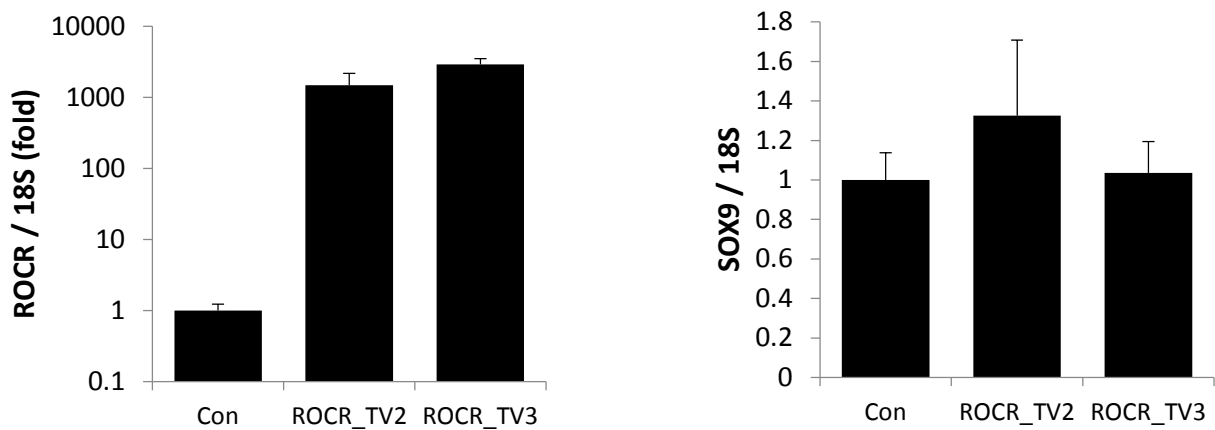

Supplementary Figure 6.

A. MSC were transduced for 2 days with *ROCR*-expressing lentivirus particles (transcript variant 2 and 3) prior to chondrogenic differentiation for up to 7 days. Expression of *ROCR*, *SOX9*, *COL2A1* and *ACAN* in RNA extracted from Day 0, 1, 3 and 7 chondrogenic pellets. Values are the mean  $\pm$  SEM of data pooled from 2 MSC donors. B. *ROCR* and *SOX9* expression in HAC transduced with *ROCR*-expressing lentivirus particles (transcript variant 2 and 3) for 3 days. Values are the mean  $\pm$  SEM of data pooled from 2 OA HAC donors.

## Supplementary Figure 7

A.

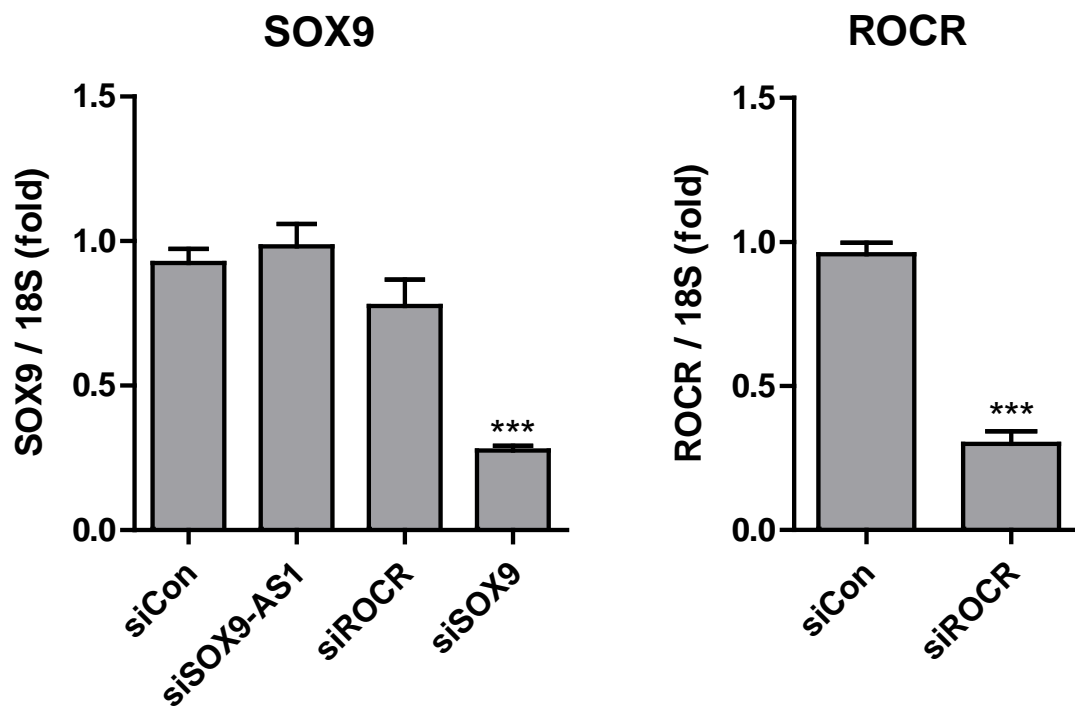

B.

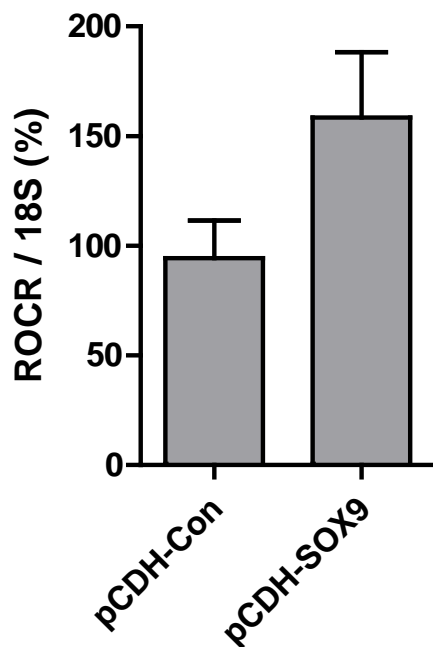

Supplementary Figure 7.

A. *SOX9* and *ROCR* expression in HAC transfected for 2 days with the indicated siRNAs. Values are the mean  $\pm$  SEM of data pooled from 4 OA HAC donors. \*\*\* =  $P < 0.001$ . B. *ROCR* expression in MSCs transduced with *SOX9* or control lentivirus (pCDH) for 2 days. Values are the mean  $\pm$  SEM of data pooled from 4 MSC donors.

# Supplementary Figure 8

A.

Mus musculus cDNA sequence BC006965 (BC006965), long non-coding RNA  
 Sequence ID: [NR\\_024085.1](#) Length: 1952 Number of Matches: 1

| Score         | Expect | Identities | Gaps     | Strand    |
|---------------|--------|------------|----------|-----------|
| 50.0 bits(54) | 9e-04  | 66/92(72%) | 0/92(0%) | Plus/Plus |

  

| Query | Score               | Expect              | Identities             | Gaps                   | Strand              |
|-------|---------------------|---------------------|------------------------|------------------------|---------------------|
| 65    | GAACTACTTAAGCATCAAC | 124                 | TAATTAATCTGCAAGTGAAGAA | TACTCTCCAGCATTACTCTA   |                     |
| Sbjct | 644                 | GAAGTGCCTCAGCATCCAC | 703                    | TAATTAATCCATCAGCAAAGAA | TGCTGCCTCCATCTCTCCA |
| 125   | TAATTAGACAATCTCAGG  | 156                 | GAGGAAACAAGAGGA        |                        |                     |
| Sbjct | 704                 | TCATTAGCCAGTCTTCAA  | 735                    | AGAAGCAAGAGGA          |                     |

B.

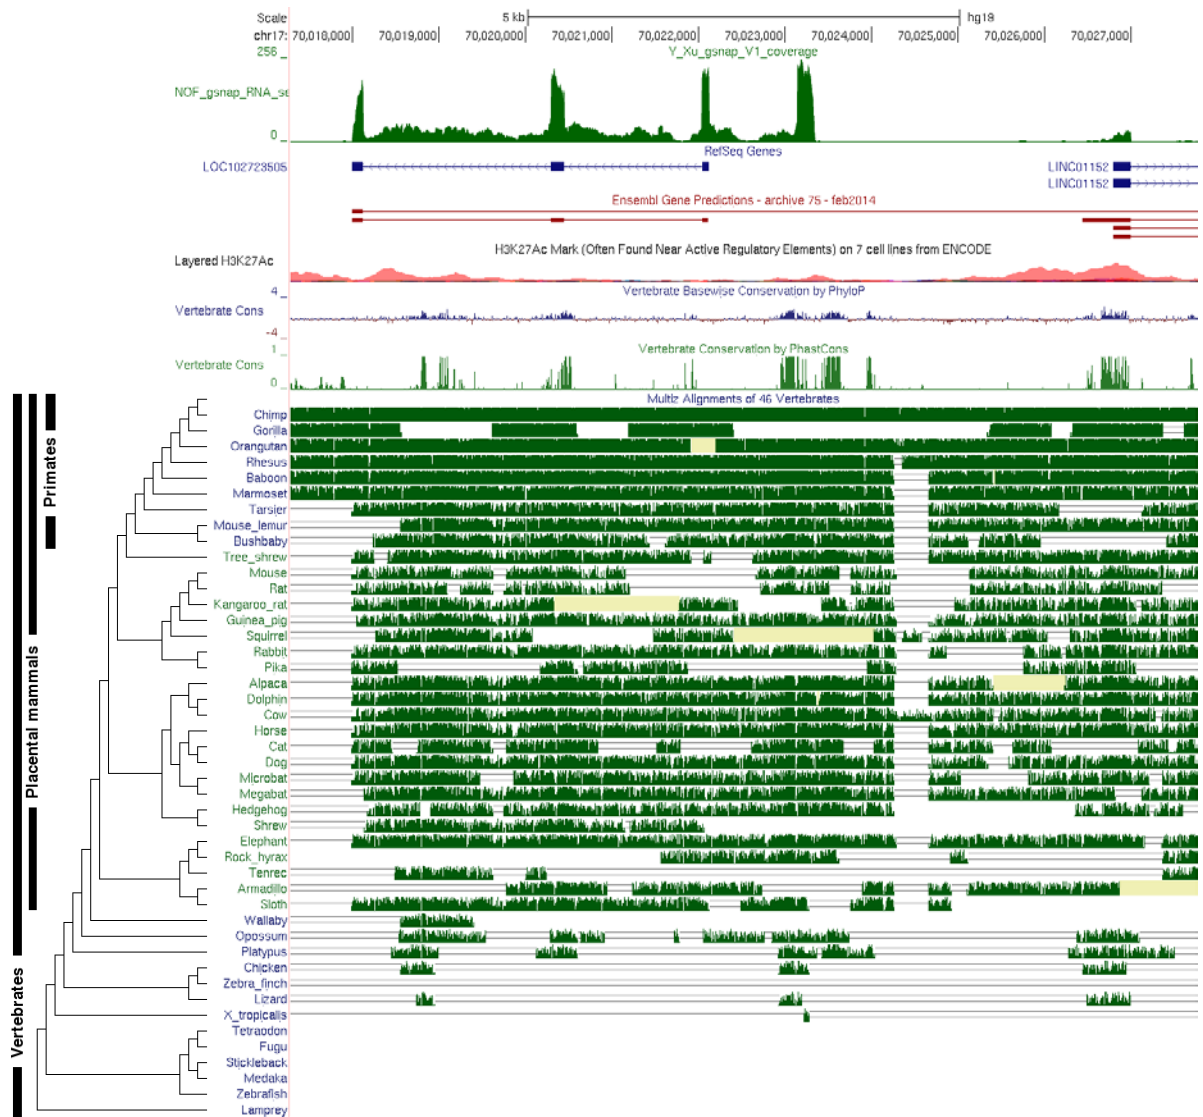

C.

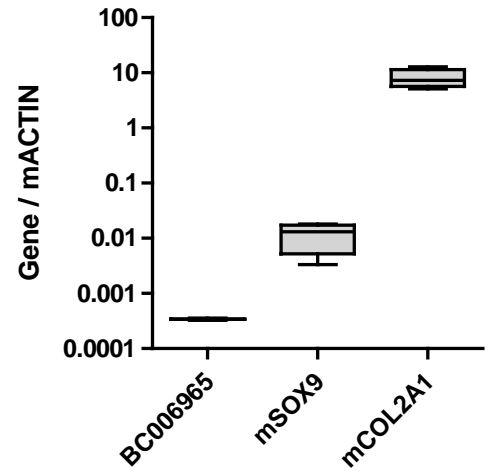

Supplementary Figure 8.

A. Blastn result of homology search for *ROCR* sequence in mouse. B. UCSC genome browser schematic of the *ROCR* locus showing vertebrate conservation. C. Expression of *Bc006965*, *Sox9* and *Col2a1* in C57BL/6 mouse xiphoid cartilage RNA.

## Supplementary Figure 9

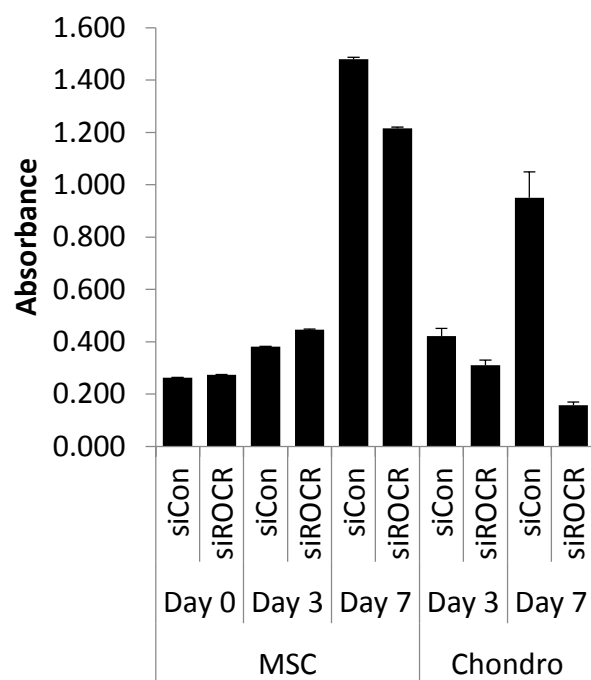

## Supplementary Figure 9.

MSCs were transfected for 2 days with *ROCR*-targetting or non-targetting control siRNA prior to chondrogenic differentiation in a V-bottom 96 well plate or maintenance in MSC medium for up to 7 days. Media were collected immediately prior to the induction of chondrogenesis (Day 0) and after 3 and 7 days. Cytotoxicity was measured with the use of the Promega CytoTox 96 kit.



## Supplementary Table 1.

## Primer and siRNA/GapmeR sequences.

| Primer             | Sequence                  | Probe |
|--------------------|---------------------------|-------|
| SOX9-AS1 exon4-5 F | cctgagcatttctcgtctg       | 65    |
| SOX9-AS1 exon4-5 R | caggacaaggtggatgaaca      |       |
| SOX9-AS1 exon5-6 F | ctggcaagaggcaggaaa        | 38    |
| SOX9-AS1 exon5-6 R | gctctcatccaaggtgaacag     |       |
| ROCR exon2-3 F     | tgctgtatgaccagcctattg     | 11    |
| ROCR exon2-3 R     | tcctctgtttcctcctgaga      |       |
| ROCR exon1-2 F     | ctgaaggcaaaggcaagc        | 18    |
| ROCR exon1-2 R     | caaacatgtgtcttaaaggctct   |       |
| LINC01152 F        | cctcacttcctcctcttctg      | 19    |
| LINC01152 R        | ccccatctcatctgttttga      |       |
| RUNX2 F            | gtgcctaggcgcatttca        | 29    |
| RUNX2 R            | gctcttctactgagagtgaagg    |       |
| ALPL F             | agaaccccaaaggcttcttc      | 31    |
| ALPL R             | cttgcttttccttcatggt       |       |
| ADIPOQ F           | ggtgagaagggtgagaaagga     | 85    |
| ADIPOQ R           | ttcaccgatgtctcccttag      |       |
| FABP4 F            | ccaccataaagagaaaacgagag   | 31    |
| FABP4 R            | gtggaagtgacgcctttcat      |       |
| L-SOX5a F          | ttacctcaggagttgaaagga     | 38    |
| L-SOX5a R          | gcttgtcaccatggctacct      |       |
| SOX6 F             | gcttctggactcagcccttta     | 67    |
| SOX6 R             | ggcccttagcctttggta        |       |
| ROCR RACE GSP1     | TTTGAAATCCTCTTGTTTC       |       |
| ROCR RACE GSP2     | CAAAACATGTGTCTTAAAAGGCTCT |       |
| siRNA              | Target sequence           |       |
| siSOX9-AS1         | CAAAGGAGCTAAAGAAGAA       |       |
| siROCR-1           | GGAGGAAACAAGAGGATTT       |       |
| siROCR-2           | CAACCATAGAACAGACAAA       |       |
| GapmeR             | Target sequence           |       |
| GapROCR            | ACTTAAGCATCAACTA          |       |

Supplementary Table 2.

Cartilage RNA-Seq lncRNA expression and *SOX9* expression.

[Click here to Download Table S2](#)

Supplementary Table 3.

Expression of *ROCR* and *SOX9-AS1* in cell types from Human Protein Atlas and Illumina BodyMap RNA-Seq data.

[Click here to Download Table S3](#)
